# Supplementary material for: Cross-dressing of CD8α+ Dendritic Cells with Antigens from Live Mouse Tumor Cells Is a Major Mechanism of Cross-priming
Source: Oxford University Press journal article supplement (doi:10.1158/2326-6066.cir-20-0248), 2020-08-05
Supplement: 23266066cir200248-sup-240429_2_supp_6429505_qrcn8r.docx [file 23266066cir200248-sup-240429_2_supp_6429505_qrcn8r.docx]

**Supplementary Figure 1**

**Sub-tumorigenic dose (Meth A)**

**
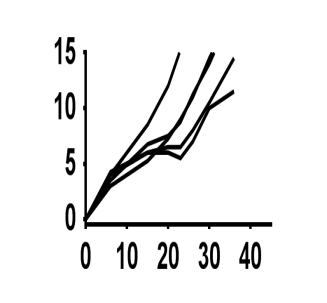

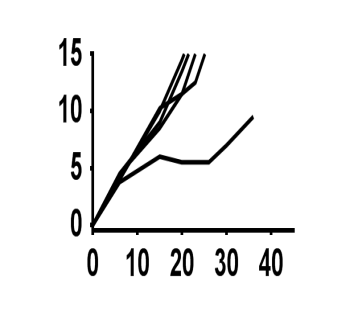
A.**

**AVERAGE**

**DIAMETER OF TUMOR (mm.)**

**10,000**

**100,000**

**15,000**

**20,000**

**25,000**

**50,000**

**5,000**

**0/4**

**0/10**

**0/9**

**3/10**

**5/10**

**5/5**

**5/5**

**DAYS POST TUMOR CHALLENGE**


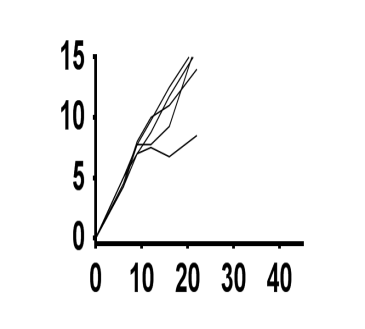
**B.**

**Immunization (HBSS/15,000 Meth A /10,000 Meth A)**

**Lethal Challenge**

**10,000**

**HBSS**

**15,000**

**AVERAGE**

**DIAMETER OF TUMOR (mm.)**

(**100,000 Meth A**)

**Day -14**

**Day 0**

**Tumor progression**

**6/10**

**0/9**

**5/5**

**DAYS POST TUMOR CHALLENGE**

**D.**

**C.**

**Mean Diameter of Tumor**

**Mean Diameter of Tumor**

**CMS5**

**MethA**

**N=10**

**N=10**

**Days post tumor challenge**

**Days post tumor challenge**

**Supplementary figure 1**

**Small** **numbers** **of** **live** **but** **not** **irradiated** **CMS5** **and** **Meth** **A** **tumor** **cells** **could** **elicit** **potent** **tumor** **immunity**

**(A)** Groups of BALB/c mice were challenged with single titrated dose of live MethA cells, within a range of 10,000-100,000 cells (i.e. mice were challenged with 10,000, or 15,000, or 20,000, or 25,000, or 50,000, or 100,000 Meth A cells) and monitored for tumor development to determine the sub-tumorigenic dose for MethA. **(B)** Three groups of BALB/c mice were immunized with either HBSS or one of the two sub-tumorigenic doses of live MethA cells (e.g.

15,000 or 10,000 MethA cells) on their right flanks. Two weeks later all the 3 groups of mice were challenged with a lethal dose of MethA (100,000 cells) on their left flanks and monitored for tumor progression. Average tumor size is shown for each mouse. **(C),** **(D)** BALB/c mice were immunized i.d. with HBSS or 25,000 live CMS5 cells, or 25,000 irradiated CMS5 cells (**C**) or HBSS, or 15,000 live Meth A cells, or 15,000 irradiated Meth A cells (**D**). Two weeks later, mice were challenged with lethal dose of CMS5 (200,000 cells) **(C)** or Meth A (100,000 cells) **(D)** and monitored for tumor progression. Mean diameter of tumor for each group of mice (n=10) is shown**.**

**A**.

**Immunization**

(**HBSS/** **live** **sub-tumorigenic** **dose/** **Irradiated** **EG7cells**)

**Supplementary Figure 2**

**Lethal** **Challenge** (**300,000** **Live** **EG7**)

**Tumor** **progression**

**Day-14** **Day** **0** **Day** **30**

**B**.


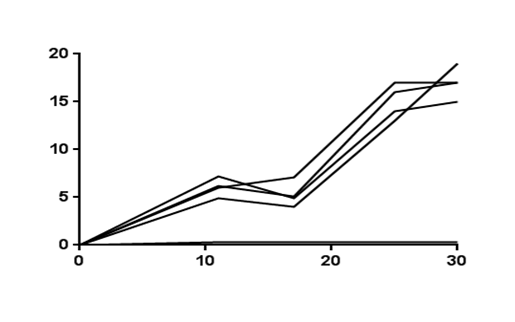

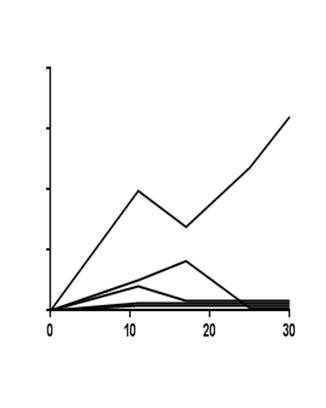


**AVERAGE**

**DIAMETER** **OF** **TUMOR** **(mm.)**

**HBSS** **5,000** **live** **EG7**

**4/5** **1/5**

**Days** **post** **tumor** **challenge** **C.**

**25,000** **IR** **EG7** **100,000** **IR** **EG7**


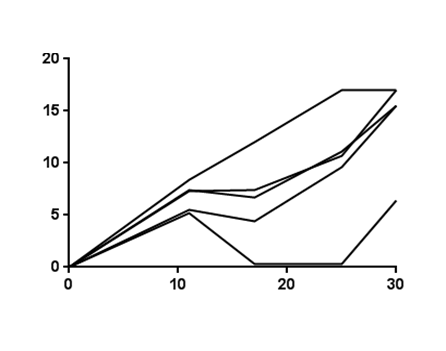

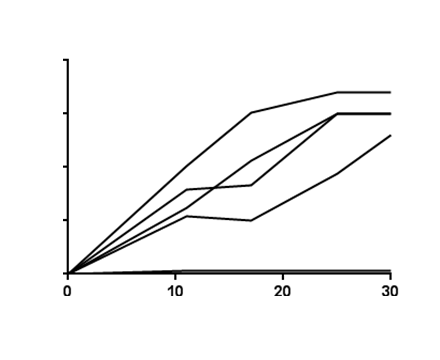

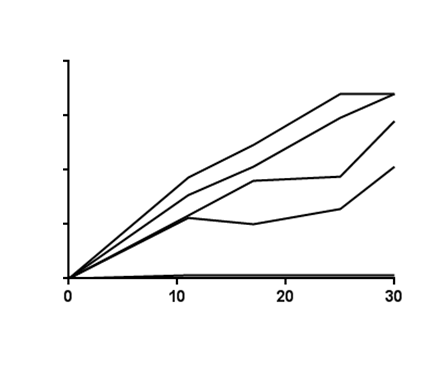

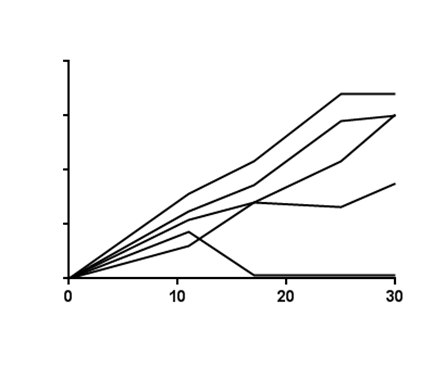

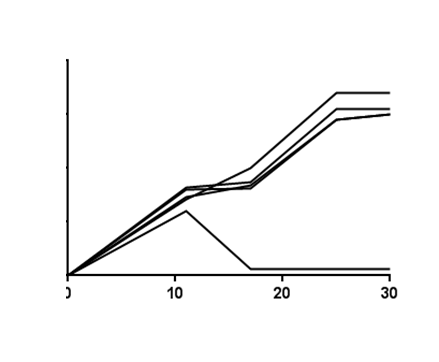

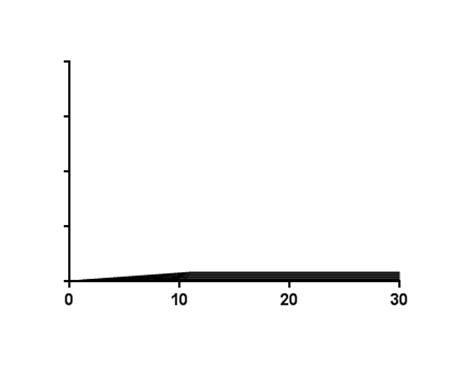


**AVERAGE**

**DIAMETER** **OF** **TUMOR** **(mm.)**


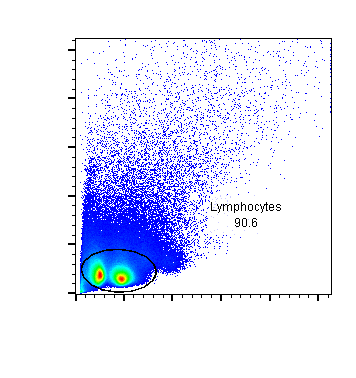

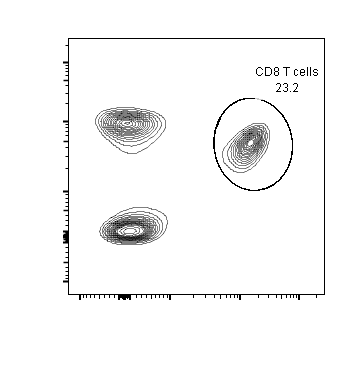

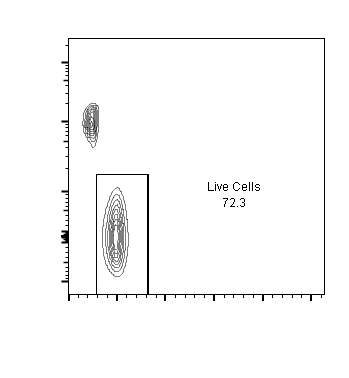


**CD3**

**CD45.1**


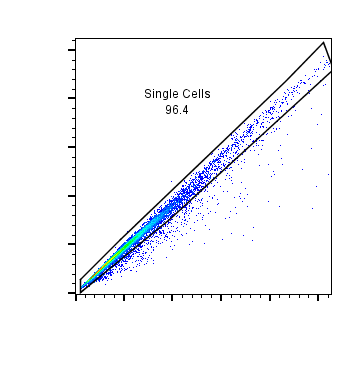

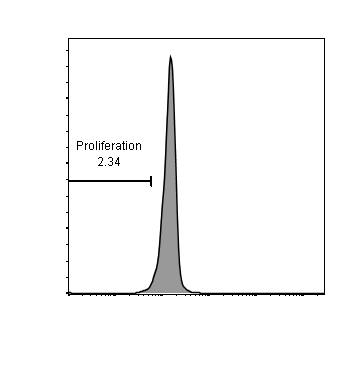

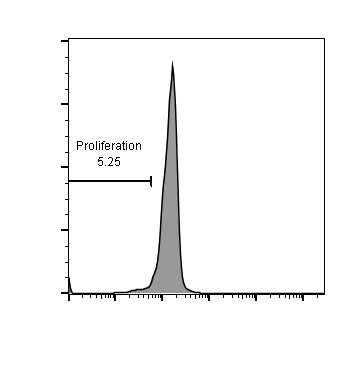

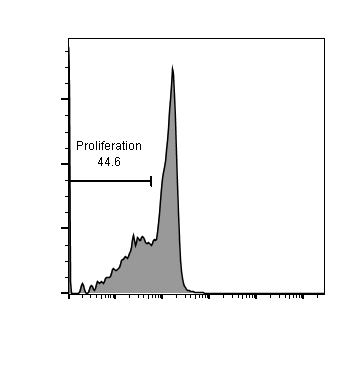

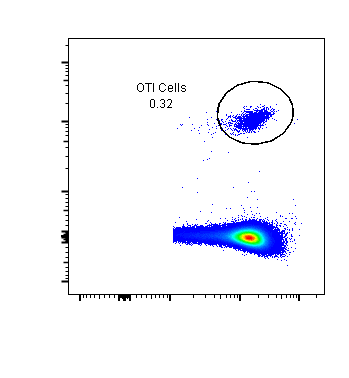


**SSC-H**

**7-AAD**

**SSC-A**


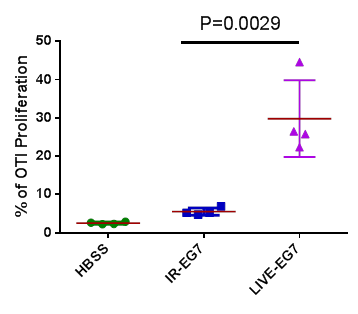


**500,000** **IR** **EG7** **1x10^6** **IR** **EG7** **10x10^6** **IR** **EG7** **25x10^6** IR EG7

**5/5** **4/5** **4/5** **4/5** **3/5** **0/5**

**Days** **post** **tumor** **challenge**

**D**. **Live** **cells**

**FSC-A** **FSC-A** **E**. **HBSS** **IR** **EG7** **cells**

**Single** **cells**

**SSC-A**

**Live** **EG7** **cells**

**CD8-Tcells**

**CD8α**

**OT-I** **cells**

**CD8α**

**CFSE**

**F. Live cells Single cells CD3+ Cells CD8+ T cells**

**
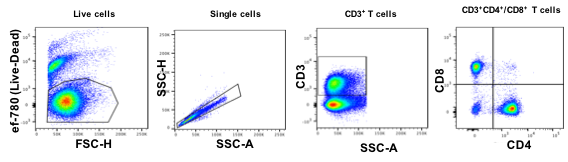
**

**Supplementary figure 2**

**Live** **EG7** **cells** **are** **more** **immunogenic** **than** **irradiated** **EG7** **cells**

**(A)(B)(C)** C57/BL6 mice were immunized with single sub tumorigenic dose of live EG7 cells (i.e.5,000 cells) or single titrated dose of irradiatedEG7 cells (i.e. 25,000, or 100,000, or, 500,000, or 106, or 107, or 25x106 cells). Two weeks later mice were challenged with lethal dose of EG7 (i.e.300,000 cells) and monitored for tumor progression. Average tumor size is shown for each mouse (n=5 mice per group). **(D)(E)** C57/BL6 mice were adoptively transferred with CFSE labeled naïve OT-I cells. After 24 h mice were injected i.d. with HBSS or 106 live or irradiated EG7 cells. After 3.5 days of OT-I CD8+ T cells transfer, dLNs were harvested from mice and single cell suspensions were analyzed for proliferation of OT-I cells in terms of CFSE dilution **(D)** Representative pseudo color and contour plots display the gating strategy used to analyze proliferation of OT-I cells **(E)** Representative histogram plots displaying percentage of OT-I cells undergoing proliferation is shown**.** Shown in the graph is the percentage of OT-I cells undergoing proliferation, in vivo following immunization with HBSS or live or irradiatedEG7 cells. **(F)** Representative pseudo color and contour plots display the gating strategy used to gate CD8+ T cells. Data points in the graph represent mean ± SEM (n=4). P value was determined by unpaired two tailed Student’s t test.

**Supplementary Figure 3**

**Immunization** **Challenge**

**Immunization** **Challenge** **A.** **B.**


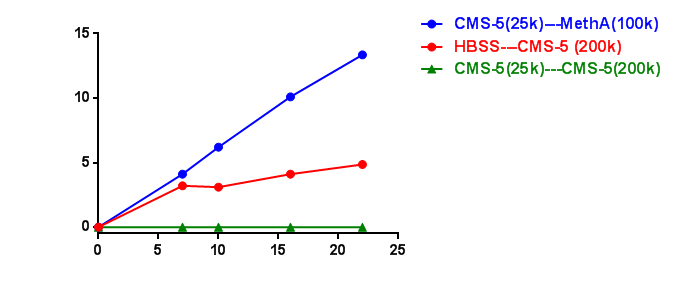

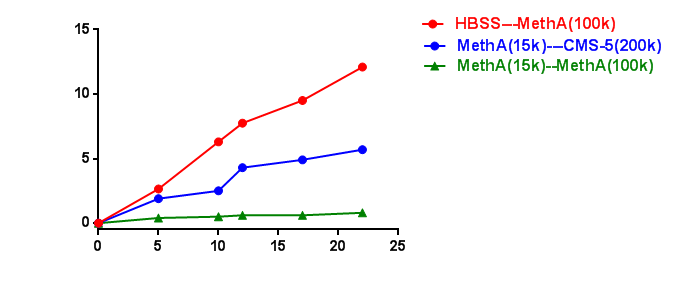

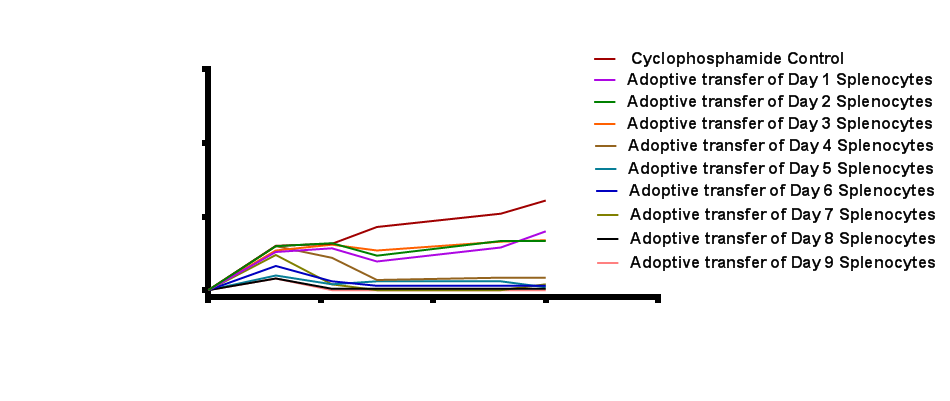

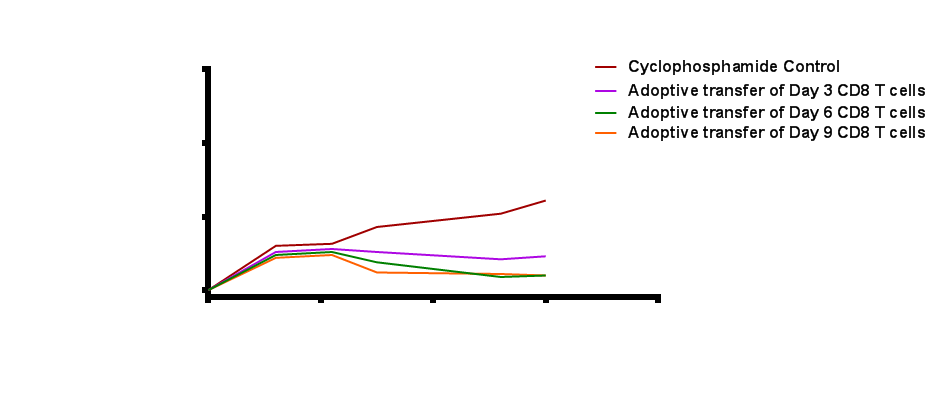

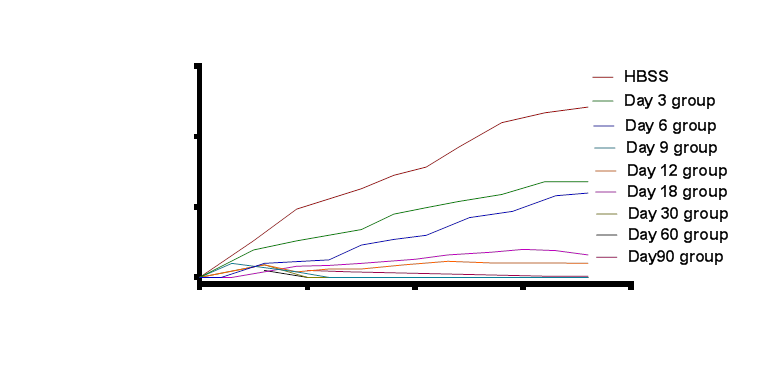

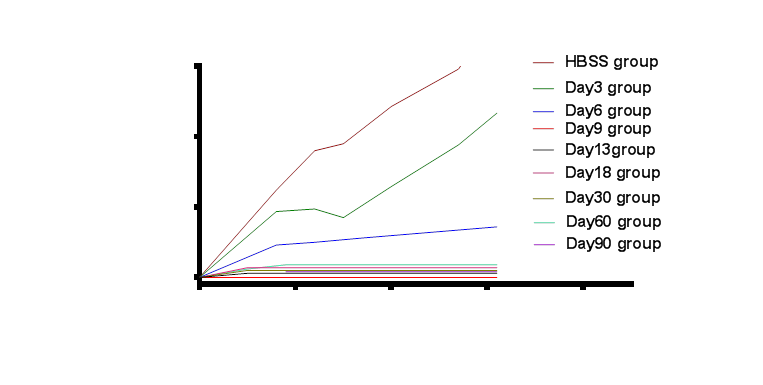

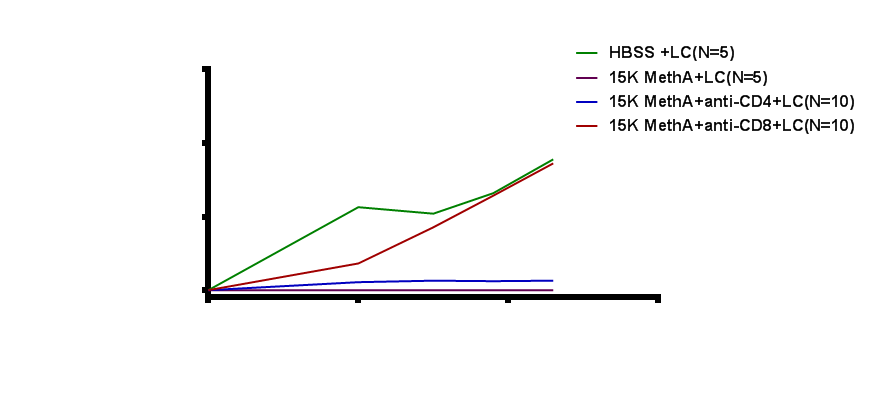


10

20

0 30

**MEAN**

**DIAMETER** **OF** **TUMOR** **(mm.)**

**MEAN**

**DIAMETER** **OF** **TUMOR** **(mm.)**

**MEAN**

**DIAMETER** **OF** **TUMOR** **(mm.)**

**MEAN**

**DIAMETER** **OF** **TUMOR** **(mm.)**

**MEAN**

**DIAMETER** **OF** **TUMOR** **(mm.)**

**MEAN**

**DIAMETER** **OF** **TUMOR** **(mm.)**

**MEAN**

**DIAMETER** **OF** **TUMOR** **(mm.)**

**DAYS** **POST** **TUMOR** **CHALLENGE** **C.**

15

10

5

0 0 10 20 30 40 **DAYS** **POST** **TUMOR** **CHALLENGE**

**E.**

15

10

5

**DAYS** **POST** **TUMOR** **CHALLENGE** **D.**

15

10

5

0

0 10 20 30 40 **DAYS** **POST** **TUMOR** **CHALLENGE**

**F.**

15

10

5

0

0 10 20 30 40

0

0 10 20 30 40

**DAYS** **POST** **TUMOR** **CHALLENGE** **DAYS** **POST** **TUMOR** **CHALLENGE**

**G.**

10

**H.** **IMMUNIZATION**


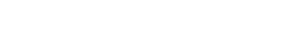


**Day-14**

**TUMOR** **CHALLENGE**

**Day0**

-**2day** **4day**

**TUMOR** **PROGRESSION**

**10day**

**Anti-CD8/Anti-CD4**

5

0

**DAYS** **POST** **TUMOR** **CHALLENGE**

**Supplementary figure 3**

**Anti-tumor** **Immunity** **elicited** **by** **live** **tumor** **cells** **is** **specific,** **long** **lasting** **and** **CD8+T** **cell** **dependent**

**(A)** BALB/c mice were immunized i.d. with single sub-tumorigenic immunizing dose of CMS5 (25,000 cells). Two weeks later, mice were challenged with lethal dose of CMS5 (200,000 cells, Green line) or lethal dose of MethA (100,000 cells, Blue line) and monitored for tumor development**.** Control group of mice, which were immunized with HBSS were challenged with lethal dose of CMS5 (Red line). Mean diameter of tumor for each group of mice (n=5) are shown **(B)** BALB/c mice were immunized i.d. with single sub-tumorigenic immunizing dose of MethA (15,000 cells). Two weeks later, mice were challenged with lethal dose of MethA (100,000 cells, Green line) or lethal dose of CMS5 (200,000 cells, Blue line) and monitored for tumor development**.** Control group of mice that were immunized with HBSS were challenged with lethal dose of MethA (Red line). Mean diameter of tumor for each group of mice (n=5) are shown. **(C)** BALB/c mice were immunized with sub-tumorigenic immunizing dose of CMS5(25,000 cells). Different groups of immunized mice were given lethal challenge of CMS5(200,000 cells) on different days (i.e. d3, or d6, or d9, or d12, or d18, or d30, or d60, or d90) and monitored for tumor progression. Mean diameter of tumor for each group of mice (n=5) is shown. **(D)** BALB/c mice were immunized with sub-tumorigenic immunizing dose of MethA (15,000 cells). Different groups of immunized mice were given lethal challenge of MethA (100,000 cells) on different days (i.e. d3, or d6, or d9, or d12, or d18, or d30, or d60, or d90) and monitored for tumor progression. Mean diameter of tumor for each group of mice (n=5) is shown. **(E)** BALB/c mice were immunized with sub-tumorigenic immunizing dose of CMS5(25,000 cells). Different days following immunization (Day1-9), splenocytes were harvested from immunized mice and adoptively transferred to recipient BALB/c mice, bearing 3day old tumor (i.e these mice were challenged with lethal dose days before). The recipient BALB/c mice were administered with cyclophosphamide (at the dose of 100mg/kg body weight), 1h before adoptive transfer. Hence, control group of mice were also administered with same dose of cyclophosphamide. Following adoptive transfer, the recipient BALB/c mice were monitored for tumor progression. Mean diameter of tumor for each group of mice (n=5) are shown. **(F)** BALB/c mice were immunized with sub-tumorigenic immunizing dose of CMS5(25,000 cells). After 3days or 6days or 9days following immunization, CD8+ T cells were enriched from sdLNs and spleens of immunized mice and adoptively transferred to recipient BALB/c mice, as mentioned before. Following adoptive transfer, the recipient BALB/c mice were monitored for tumor progression. Mean diameter of tumor for each group of mice (n=5) are shown. **(G)** BALB/c mice were immunized with sub-tumorigenic immunizing dose of MethA (15,000 cells). Immunized BALB/c mice were subjected to depletion of CD8 cells (Red line) or CD4 cells (Blue line) using anti-CD8 (**clone** **2.73**) and anti CD4-(**clone** **GK** **1.5**) as shown in **(H)** or left as such, with no depletion (Purple line). Control group of mice were immunized with HBSS (Green line). Two weeks following initial immunization, all mice were challenged with lethal dose of MethA (100,000 cells) and monitored for tumor progression. Mean diameter of tumor for each group of mice (n=5) are shown.

**Supplementary Figure 4**

**Live** **cells**


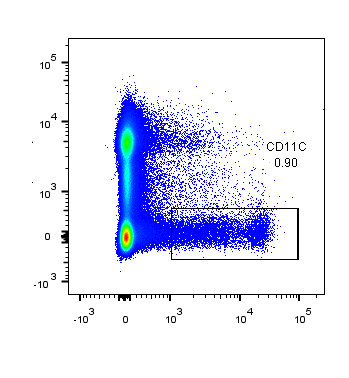

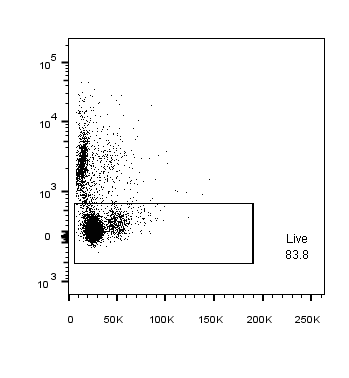

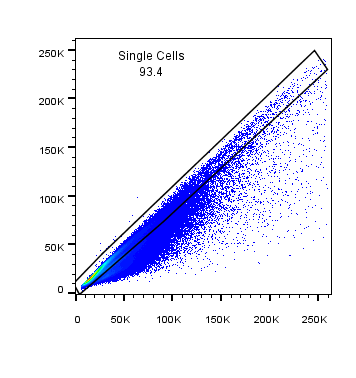


**APC-eF-780**

**CD11c-BV421**

**CD8α-AF700**


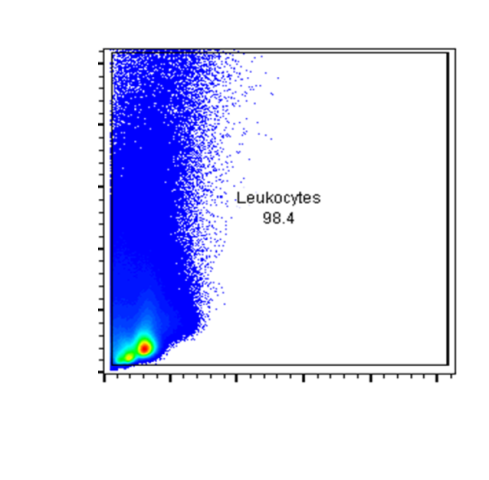


**SSC-H**


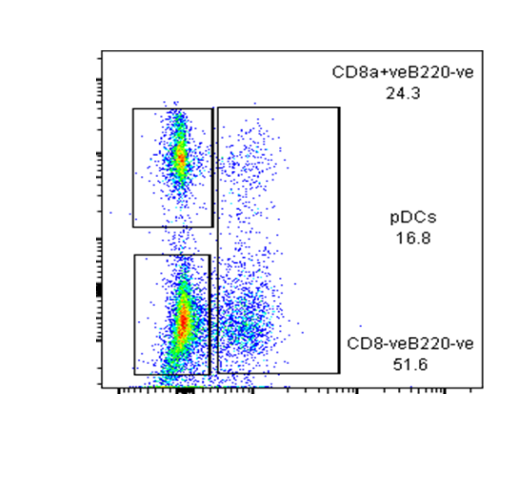


**SSC-A**


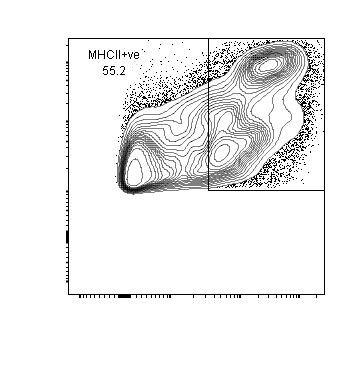


**CD3/CD19-Pe-Cy7**

**FSC-A** **FSC-A** **SSC-A**

**CD11c-BV421** **MHCII** **–PercP-Cy5.5** **B220-BV650**

**Supplementary figure 4**

**Gating** **strategy** **for** **uptake** **of** **cell-associated** **antigens** **by** **DCs** **at** **sdLNs**

C57BL/6 mice were injected i.d. with HBSS or 107 PKH26 (8µM) labeled live or irradiated EG7 cells. About 36 h later, single cell suspensions from dLNs of each group of mice were stained, with a cocktail of antibodies for subsets of APCs. Representative dot plots and contour plots displaying the gating strategy used for analyzing the uptake of cell-associated antigens by CD8α+ DCs, CD8α- DCs, and pDCs is shown.

**Supplementary Figure 5**

**Live** **cells**


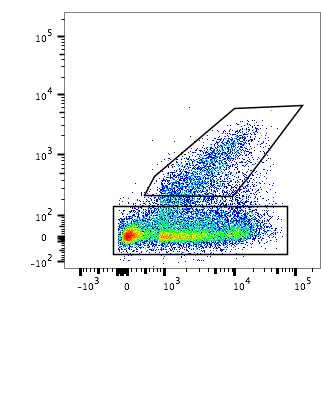

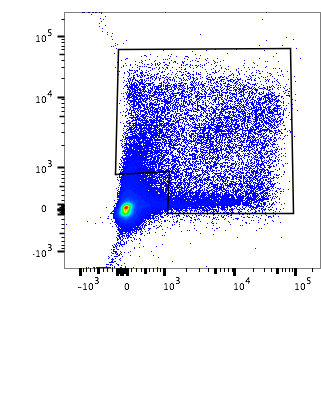

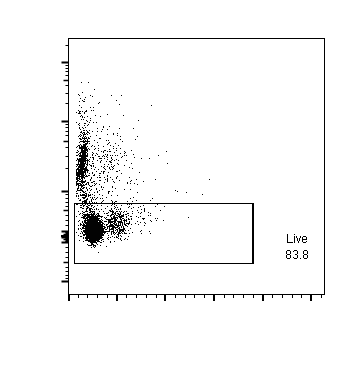

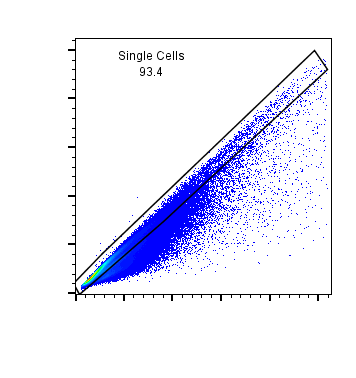


**APC-eF-780**


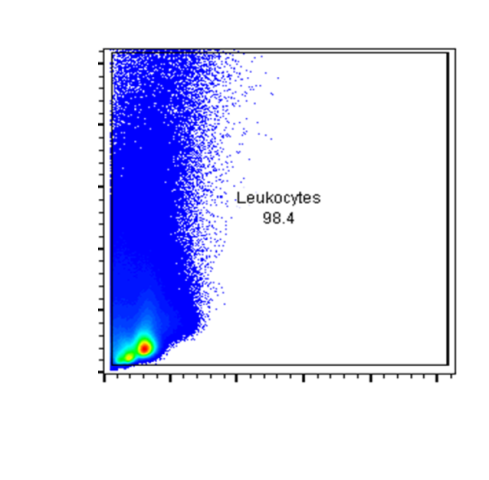


**SSC-A**

**SSC-H**

**CD169-APC**

**CD11b-FITC**

**FSC-A**

**CD11c-BV421**

**FSC-A** **SSC-A**

**CD11c-BV421**

**Supplementary figure 5**

**Gating** **Strategy** **for** **uptake** **of** **cell-associated** **antigen** **by** **CD169+** **macrophages**

C57BL/6 mice were injected i.d. with HBSS or 1x107 PKH26 (8 µM) labelled live or apoptotic (IR) EG7 cells. About 36 h later, single cell suspensions from dLNs of each mouse were stained, with a cocktail of antibodies for subsets of APCs. Representative dot plots and contour plots displaying the gating strategy used for analyzing the uptake of cell-associated antigens by CD169+ macrophages are shown.

**Supplementary Figure 6** **A.**

**Single** **cells** **Live** **cells** **EG7** **(Isotype** **control)** **EG7** **(Stained)**


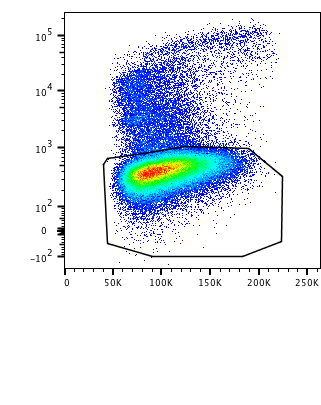

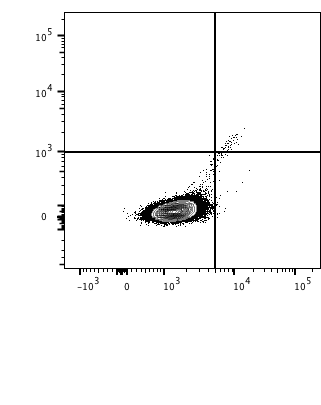

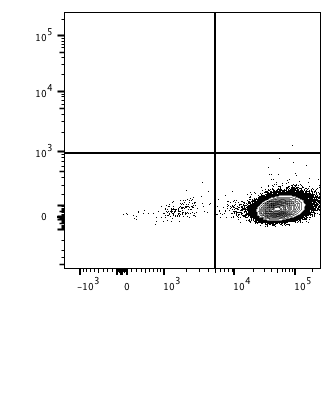


**Live-Dead(ef-780)**

**CD45.1-APC**

**0.0** **0.046** **0.0** **0.001**


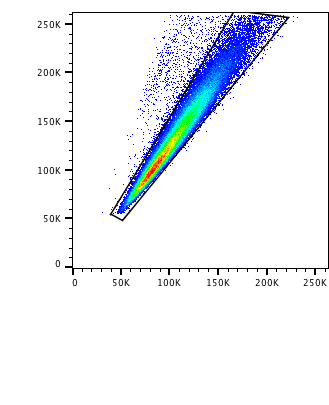


**SSC-A**

**0.052** **99.8**

**SSC-H** **SSC-H** **CD45.2-FITC** **B.**

**Single** **cells** **Live** **cells**


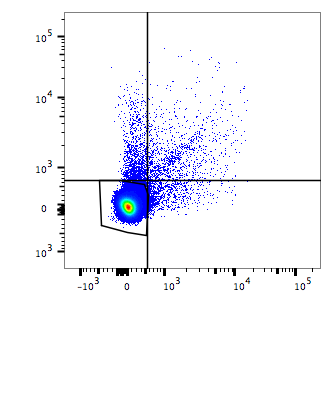


**CD11c-BV421**


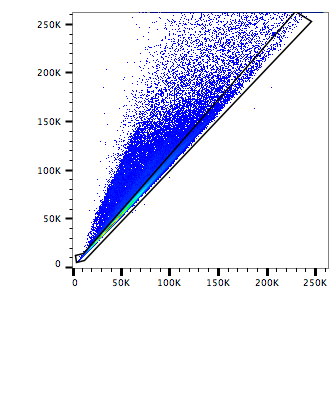

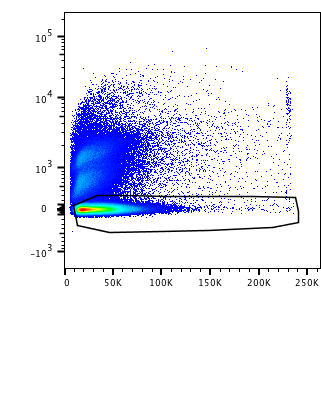


**Live-Dead(ef-780)**

**0.28** **0.24**

**SSC-A**

**94.1**

**85.5** **0.25** **99.2**

**SSC-H** **SSC-H** **CD11b-BV510**

**Non-draining** **LN** **Draining** **LN**


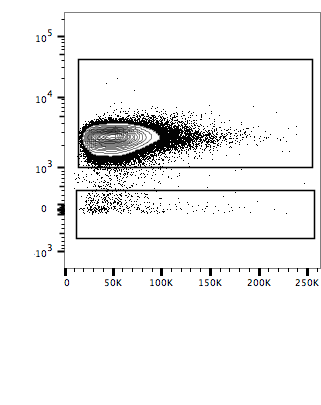

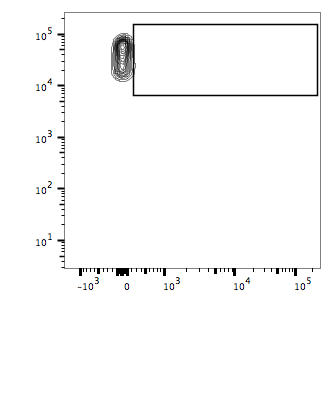

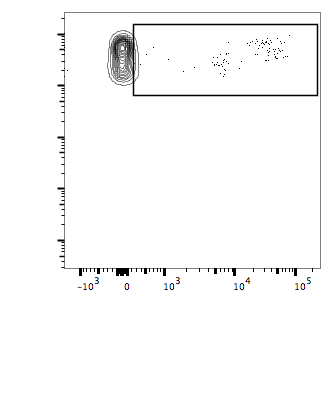


**FSC-A**

**CD45.1-PercpCy5.5**

**99.3**

**0.04 5.41** **5.41**

**0.40**

**SSC-A**

**PKH26**

**Supplementary figure 6**

**Flow** **cytometric** **analysis** **of** **live** **tumor** **cells** **accumulating** **in** **sdLNs** **following** **i.d.** **injection**

**(A)** Live EG7 cells were analyzed for expression of congenic markers CD45.1 and CD45.2. Representative pseudo color plots displaying expression profile of CD45.1 and CD45.2 on live EG7 cells are shown. **(B)** CD45.1+ congenic strain of C57BL/6 mice were injected with 107

PKH26 labelled live EG7 cells which were CD45.2+. After 24h, single cell suspension of sdLNs were pooled and stained with viability dye (ef 780), APC markers (i.e.CD11b and CD11c), and congenic marker for the host (CD45.1) to exclude dead cells, host cells (APCs as well as non-APCs) from analysis to detect the presence of ef 780-CD11c-CD11b-CD45.1-PKH26+ cells, representing live tumor cells in sdLNs. Representative pseudo color dot plots and contour plots displaying the presence of live PKH26+ EG7 tumor cells in sdLN are shown.

**Supplementary Figure 7**


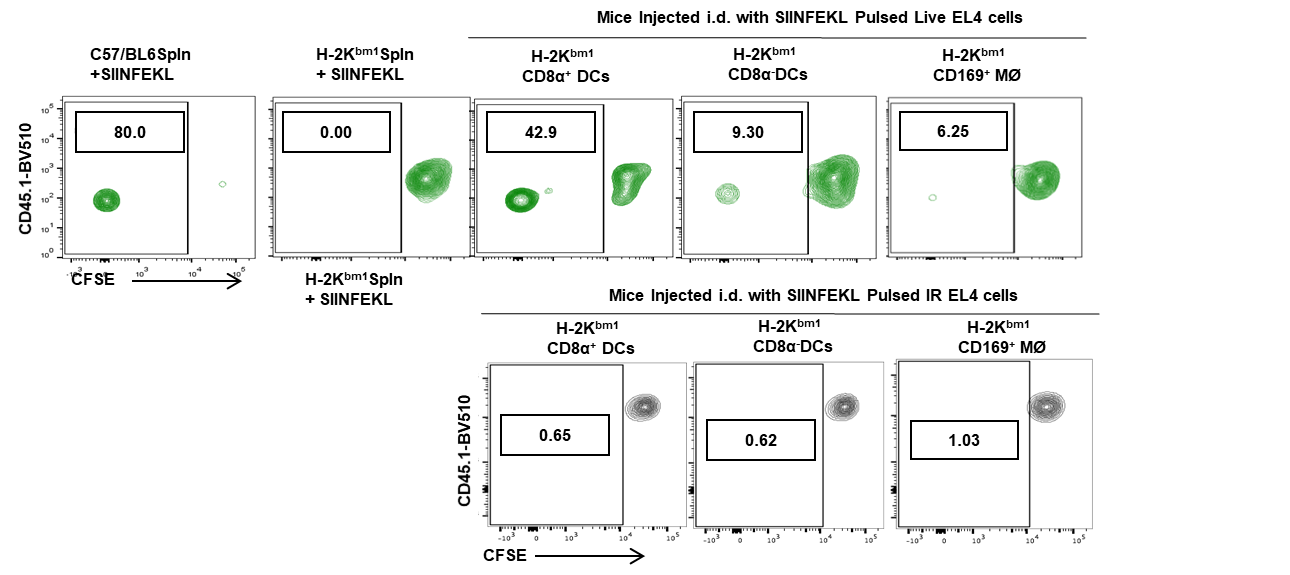


**Supplementary Figure 7 Cross-dressing by CD8α+ DCs is more efficient from live tumor cells than irradiated tumor cells**

Representative contour plots (top) displaying proliferation of OT-I cells induced by different APC subsets sorted from single cell suspension of sdLNs of H-2Kbm1 mice immunized with 107 SIINFEKL pulsed live EL4 cells (upper Panel) and 107 SIINFEKL pulsed irradiated EL4 cells(lower panel). Splenocytes of C57BL/6 mice and H-2Kbm1 mice were pulsed with SIINFEKL and used as positive control (first plot from left in the upper panel) and negative control (second plot from left in the upper panel) in the OT-I proliferation assay, respectively. The graphs for these figures are presented in **Fig.4 E, F**.

**Supplementary Figure 8** **A**. **B.**

**Batf3** **+/+** **LN** **Batf3** **-/-** **LN** **Batf3** **+/+** **Spleen** **Batf3** **-/-** **Spleen**

**CD8α**


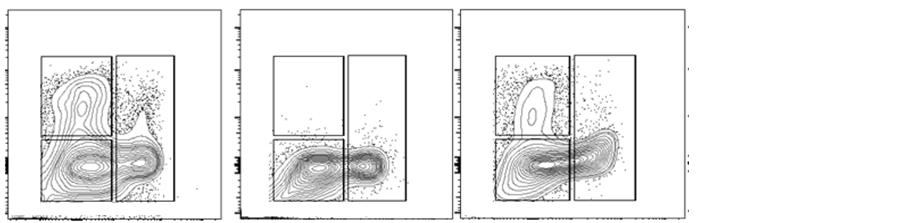

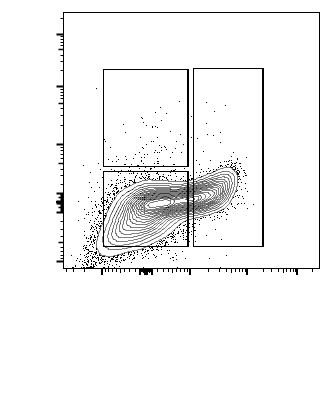


**B220**

**Supplementary figure 8**

**Batf3** **-/-** **mice** **lack** **CD8α+** **DCs** **and** **the** **CD11b+CD8 α+** **DCs** **in** **sdLNs** **reveal** **a** **lymphoid** **resident** **DC** **phenotype**

**(A)** **(B)** Single cell suspensions from sdLNs **(A)** and spleen **(B)** of wild type and *Batf3-/-*mice were stained, with a cocktail of antibodies for subsets of APCs as in **Fig.** **2A**. Representative contour plots displaying presence or absence of CD8α+ DCs (n=5 mice per group) in wild type and *Batf3-/-* mice are shown. Contour plots represent data for 2 independent experiments.
